# Supplementary material for: Study of the Diels–Alder and retro-Diels–Alder reaction between furan derivatives and maleimide for the creation of new materials
Source: Royal Society of Chemistry journal article supplement (doi:10.1039/c5ra01185j), 2015-01-01
Supplement: c5ra01185j1.pdf [file c5ra01185j1.pdf]

## Supporting information

### Maleimide Synthesis

#### *Synthesis of N-dodecylmaleimide (M<sub>2</sub>)*

The solid residue is solubilized in the minimum of THF and then precipitated in cold ether. After filtration, the solid is solubilized in the minimum of THF and then precipitated in water. After filtration, the solid is dried in oven. A white powder is obtained.

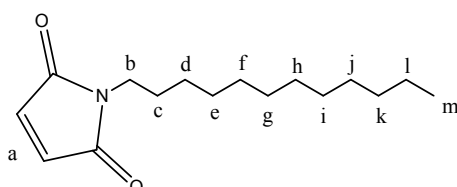

$^1\text{H NMR}$  (400MHz,  $(\text{CD}_3)_2\text{SO}$ )  $\delta$ : 7 (s, 2H, H<sub>a</sub>) 3.4-3.34 (t, 2H  $^3J_{bc}=7.1\text{Hz}$ , H<sub>b</sub>), 1.52-1.41 (m, 2H, H<sub>c</sub>), 1.22 (m, 18H, H<sub>d</sub>, H<sub>e</sub>, H<sub>f</sub>, H<sub>g</sub>, H<sub>h</sub>, H<sub>i</sub>, H<sub>j</sub>, H<sub>k</sub> and H<sub>l</sub>), 0.87-0.82 (t, 3H, H<sub>m</sub>)

#### *Synthesis of N-phenylmaleimide (M<sub>3</sub>)*

The solid residue is solubilized in the minimum of THF and then precipitated in cold ether. After filtration, the solid is solubilized in the minimum of THF and then precipitated in water. After filtration, the solid is dried in oven. A clear yellow powder is obtained.

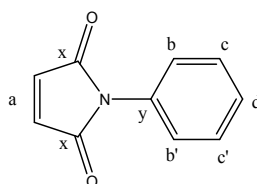

$^1\text{H NMR}$  (400MHz,  $(\text{CD}_3)_2\text{SO}$ )  $\delta$ : 7.47 (m, 5H, H<sub>b</sub>, H<sub>b'</sub>, H<sub>c</sub>, H<sub>c'</sub>, H<sub>d</sub>), 7.13 (s, 2H, H<sub>a</sub>)

$^{13}\text{C NMR}$  (100MHz,  $(\text{CD}_3)_2\text{SO}$ )  $\delta$ : 169.92 (C<sub>x</sub>), 134.64 (C<sub>a</sub>), 131.56 (C<sub>y</sub>), 128.86 (C<sub>c</sub> and C<sub>c'</sub>), 127.72 (C<sub>b</sub> and C<sub>b'</sub>), 126.8 (C<sub>d</sub>)

#### *Synthesis of N-p-nitrophenylmaleimide (M<sub>4</sub>)*

The solid residue is solubilized in the minimum of THF and then precipitated in cold ether. After filtration, the solid is solubilized in the minimum of THF and then precipitated in water. After filtration, the solid is dried in oven. A clear yellow powder is obtained.

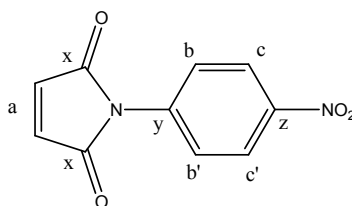

$^1\text{H}$  NMR (400MHz,  $(\text{CD}_3)_2\text{SO}$ )  $\delta$ : 8.4-8.34 (m, 2H,  $\text{H}_c$  and  $\text{H}_{c'}$ ), 7.72-7.66 (m, 2H,  $\text{H}_b$  and  $\text{H}_{b'}$ ), 7.27 (s, 2H,  $\text{H}_a$ )

$^{13}\text{C}$  NMR (100MHz,  $(\text{CD}_3)_2\text{SO}$ )  $\delta$ : 169.23 ( $\text{C}_x$ ), 145.71 ( $\text{C}_z$ ), 137.48 ( $\text{C}_y$ ), 135.04 ( $\text{C}_a$ ), 126.62 ( $\text{C}_b$  and  $\text{C}_{b'}$ ), 124.23 ( $\text{C}_c$  and  $\text{C}_{c'}$ )

### **Synthesis of *N*-4-methoxyphenylmaleimide ( $M_5$ )**

The solid residue is solubilized in the minimum of THF and then precipitated in cold ether. After filtration, the solid is solubilized in the minimum of THF and then precipitated in water. After filtration, the solid is dried in oven. A yellow powder is obtained.

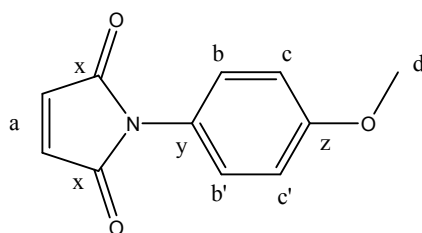

$^1\text{H}$  NMR (400MHz,  $(\text{CD}_3)_2\text{SO}$ )  $\delta$ : 7.26-7.20 (m, 2H,  $\text{H}_b$  and  $\text{H}_{b'}$ ), 7.14 (s, 2H,  $\text{H}_a$ ), 7.05-6.99 (m, 2H,  $\text{H}_c$  and  $\text{H}_{c'}$ ), 3.78 (s, 3H,  $\text{H}_d$ )

$^{13}\text{C}$  NMR (100MHz,  $(\text{CD}_3)_2\text{SO}$ )  $\delta$ : 170.18 ( $\text{C}_x$ ), 158.63 ( $\text{C}_z$ ), 134.55 ( $\text{C}_a$ ), 128.31 ( $\text{C}_b$  and  $\text{C}_{b'}$ ), 124.07 ( $\text{C}_y$ ), 114.13 ( $\text{C}_c$  and  $\text{C}_{c'}$ ), 55.34 ( $\text{C}_d$ )

### **Synthesis of *N*-methoxy-2-propylmaleimide ( $M_6$ )**

The solid residue is solubilized in the minimum of THF and then precipitated in cold ether. Then ether is evaporated. The solid is extracted with ethyl acetate and water, respectively 3/1. Then the aqueous layer is extracted twice with ethyl acetate. The organic layer is dried over anhydrous  $\text{Na}_2\text{SO}_4$ , filtrated and evaporated under low pressure. An orange liquid is obtained.

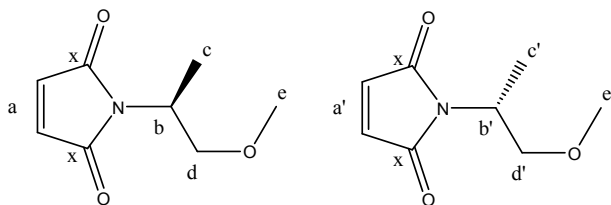

$^1\text{H}$  NMR (400MHz,  $(\text{CD}_3)_2\text{SO}$ )  $\delta$ : 6.97 (s, 2H,  $\text{H}_a$  and  $\text{H}_{a'}$ ), 4.28-4.19 (m, 1H,  $\text{H}_b$  and  $\text{H}_{b'}$ ), 3.69-3.65 (t, 1H,  $^3\text{J}=9.7\text{Hz}$ ,  $\text{H}_{d'}$ ), 3.41-3.37 (dd, 1H,  $\text{J}=9.7\text{Hz}$  and  $\text{J}=5.4\text{Hz}$ ,  $\text{H}_d$ ), 3.19 (s, 3H,  $\text{H}_e$  and  $\text{H}_{e'}$ ), 1.24 and 1.23 (s, 3H,  $\text{H}_c$  and  $\text{H}_{c'}$ )

$^{13}\text{C}$  NMR (100MHz,  $(\text{CD}_3)_2\text{SO}$ )  $\delta$ : 171.06 ( $\text{C}_x$ ), 134.42 ( $\text{C}_a$  and  $\text{C}_{a'}$ ), 72.03 ( $\text{C}_d$  and  $\text{C}_{d'}$ ), 57.93 ( $\text{C}_e$  and  $\text{C}_{e'}$ ), 45.24 ( $\text{C}_b$  and  $\text{C}_{b'}$ ), 14.69 ( $\text{C}_c$  and  $\text{C}_{c'}$ )

### **Synthesis of N-2-methoxyethylmaleimide (M<sub>7</sub>)**

The solid residue is solubilized in the minimum of THF and then precipitated in cold ether. Then ether is evaporated. The solid is extracted with ethyl acetate and water, respectively 3/1. Then the aqueous layer is extracted twice with ethyl acetate. The organic layer is dried over anhydrous Na<sub>2</sub>SO<sub>4</sub>, filtrated and evaporated under low pressure. An orange solid is obtained.

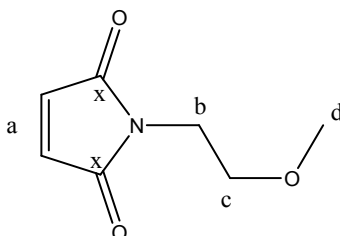

<sup>1</sup>H NMR (400MHz, (CD<sub>3</sub>)<sub>2</sub>SO) δ: 6.66 (s, 2H, H<sub>a</sub>), 3.65-3.62 (t, 2H, <sup>3</sup>J<sub>bc</sub>=5.6Hz, H<sub>b</sub>), 3.5-3.47 (t, 2H, <sup>3</sup>J<sub>cb</sub>=5.6Hz, H<sub>c</sub>), 3.25 (s, 3H, H<sub>d</sub>)

<sup>13</sup>C NMR (100MHz, (CD<sub>3</sub>)<sub>2</sub>SO) δ: 170.90 (C<sub>x</sub>), 134.56 (C<sub>a</sub>), 68.54 (C<sub>c</sub>), 57.74 (C<sub>d</sub>), 36.61 (C<sub>b</sub>)

### **Furan derivatives synthesis**

#### **Synthesis of furfuryl pivalate (F<sub>2</sub>)**

The liquid is extracted with ether and water, respectively 3/1, 3 times. The organic layer is dried over anhydrous Na<sub>2</sub>SO<sub>4</sub>, filtrated and evaporated under low pressure. A colorless oil is obtained.

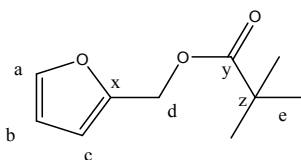

<sup>1</sup>H NMR (400MHz, (CD<sub>3</sub>)<sub>2</sub>SO) δ: 7.68-7.67 (dd, 1H, H<sub>a</sub>), 6.5-6.44 (m, 2H, H<sub>b</sub> and H<sub>c</sub>), 5.04 (s, 2H, H<sub>d</sub>), 1.12 (s, 9H, H<sub>e</sub>)

<sup>13</sup>C NMR (100MHz, (CD<sub>3</sub>)<sub>2</sub>SO) δ: 176.94 (C<sub>y</sub>), 149.49 (C<sub>x</sub>), 143.61 (C<sub>a</sub>), 110.61 (C<sub>b</sub>), 110.35 (C<sub>c</sub>), 57.66 (C<sub>d</sub>), 38.20 (C<sub>z</sub>), 26.75 (C<sub>e</sub>)

#### **Synthesis of 3,5,5-trimethylhexyl furan-2-carboxylate (F<sub>3</sub>)**

The liquid is extracted with ether and water, respectively 3/1, 3 times. The organic layer is dried over anhydrous Na<sub>2</sub>SO<sub>4</sub>, filtrated and evaporated under low pressure. A colorless oil is obtained.

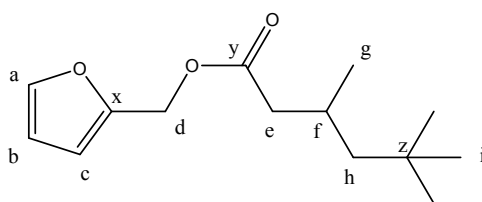

$^1\text{H NMR}$  (400MHz,  $(\text{CD}_3)_2\text{SO}$ )  $\delta$ : 7.66 (m, 1H,  $\text{H}_a$ ), 6.50-6.44 (m, 2H,  $\text{H}_b$  and  $\text{H}_c$ ), 5.04 (s, 2H,  $\text{H}_d$ ), 2.29-2.12 (ddd, 2H,  $\text{H}_e$ ), 1.98-1.88 (m, 1H,  $\text{H}_f$ ), 1.22-1.02 (ddd, 2H,  $\text{H}_h$ ), 0.91 and 0.90 (2s, 3H,  $\text{H}_g$ ), 0.85 (s, 9H,  $\text{H}_i$ )

$^{13}\text{C NMR}$  (100MHz,  $(\text{CD}_3)_2\text{SO}$ )  $\delta$ : 171.70 ( $\text{C}_y$ ), 149.42 ( $\text{C}_x$ ), 143.58 ( $\text{C}_a$ ), 110.65 ( $\text{C}_b$ ), 110.63 ( $\text{C}_c$ ), 57.16 ( $\text{C}_d$ ), 49.69 (1C,  $\text{C}_h$ ), 43.02 ( $\text{C}_e$ ), 30.62 ( $\text{C}_z$ ), 29.68 (3C,  $\text{C}_i$ ), 26.6 ( $\text{C}_f$ ), 22.28 ( $\text{C}_g$ )

### ***Synthesis of furfuryl benzoate ( $F_4$ )***

The liquid is extracted with ether and water, respectively 3/1, 3 times. The organic layer is dried over anhydrous  $\text{Na}_2\text{SO}_4$ , filtrated and evaporated under low pressure. An orange oil is obtained.

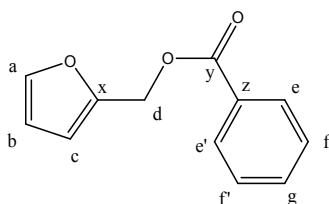

$^1\text{H NMR}$  (400MHz,  $(\text{CD}_3)_2\text{SO}$ )  $\delta$ : 8.08-8.04 (dd, 2H,  $\text{H}_e$  and  $\text{H}_{e'}$ ), 7.58-7.52 (m, 2H,  $\text{H}_f$  and  $\text{H}_{f'}$ ), 7.46-7.41 (m, 2H,  $\text{H}_a$  and  $\text{H}_g$ ), 6.52-6.38 (m, 2H,  $\text{H}_b$  and  $\text{H}_c$ ), 5.33 (s, 2H,  $\text{H}_d$ )

$^{13}\text{C NMR}$  (100MHz,  $(\text{CD}_3)_2\text{SO}$ )  $\delta$ : 165.30 ( $\text{C}_y$ ), 149.23 ( $\text{C}_x$ ), 143.85 ( $\text{C}_a$ ), 133.48 ( $\text{C}_g$ ), 129.31 ( $\text{C}_z$ ), 129.17 ( $\text{C}_e$  and  $\text{C}_{e'}$ ), 128.79 ( $\text{C}_f$  and  $\text{C}_{f'}$ ), 22.28 ( $\text{C}_g$ ), 111.04 ( $\text{C}_b$ ), 110.76 ( $\text{C}_c$ ), 58.22 ( $\text{C}_d$ )

### ***Synthesis of furfuryl cyclohexanecarboxylate ( $F_5$ )***

The liquid is extracted with ether and water, respectively 3/1, 3 times. The organic layer is dried over anhydrous  $\text{Na}_2\text{SO}_4$ , filtrated and evaporated under low pressure. The liquid is columned with Dichloromethane and hexane (30/70). A colorless oil is obtained.

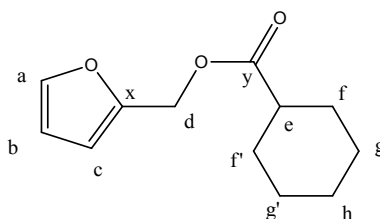

$^1\text{H}$  NMR (400MHz,  $(\text{CD}_3)_2\text{SO}$ )  $\delta$ : 7.65 (dd, 1H,  $\text{H}_a$ ), 6.49-6.43 (m, 2H,  $\text{H}_b$  and  $\text{H}_c$ ), 5.03 (s, 2H,  $\text{H}_d$ ), 2.34-2.27 (m, 1H,  $\text{H}_e$ ), 1.85-1.11 (m, 10H,  $\text{H}_f$ ,  $\text{H}_f'$ ,  $\text{H}_g$ ,  $\text{H}_g'$ ,  $\text{H}_h$ )

$^{13}\text{C}$  NMR (100MHz,  $(\text{CD}_3)_2\text{SO}$ )  $\delta$ : 174.52 ( $\text{C}_y$ ), 149.48 ( $\text{C}_x$ ), 143.62 ( $\text{C}_a$ ), 110.65 ( $\text{C}_b$ ), 110.50 ( $\text{C}_c$ ), 57.34 ( $\text{C}_d$ ), 42.01 ( $\text{C}_e$ ), 28.51 ( $\text{C}_f$  and  $\text{C}_f'$ ), 25.23 ( $\text{C}_h$ ) 24.67 ( $\text{C}_g$  and  $\text{C}_g'$ )

### **Synthesis of pentyl furan-2-carboxylate ( $F_8$ )**

The liquid is extracted with ether and water, respectively 3/1, 3 times. The organic layer is dried over anhydrous  $\text{Na}_2\text{SO}_4$ , filtrated and evaporated under low pressure. A colorless oil is obtained.

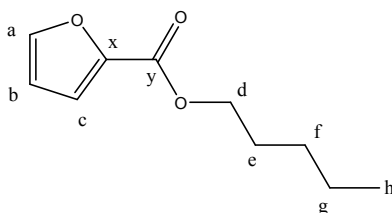

$^1\text{H}$  NMR (400MHz,  $(\text{CD}_3)_2\text{SO}$ )  $\delta$ : 7.57 (d, 1H,  $\text{H}_a$ ), 7.14 (d, 1H,  $\text{H}_b$ ), 6.49 (d, 1H,  $\text{H}_c$ ), 4.29 (t, 2H,  $\text{H}_d$ ), 1.78-1.68 (m, 2H,  $\text{H}_e$ ), 1.48-1.40 (m, 4H,  $\text{H}_f$  and  $\text{H}_g$ ), 0.93-0.87 (t, 3H,  $\text{H}_h$ )

$^{13}\text{C}$  NMR (100MHz,  $(\text{CD}_3)_2\text{SO}$ )  $\delta$ : 158.84 ( $\text{C}_y$ ), 149.51 ( $\text{C}_x$ ), 143.73 ( $\text{C}_a$ ), 110.66 ( $\text{C}_b$ ), 110.52 ( $\text{C}_c$ ), 43.11 ( $\text{C}_d$ ), 28.63 ( $\text{C}_e$ ), 28.58 ( $\text{C}_f$ ), 23.43 ( $\text{C}_g$ ), 22.3 (2C,  $\text{H}_h$ )

### **Synthesis of (5-methylfuran-2-yl)methyl acetate ( $F_9$ )**

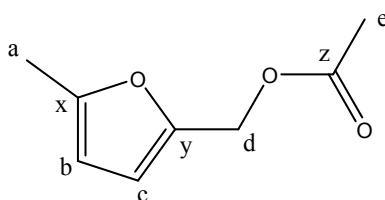

$^1\text{H}$  NMR (400MHz,  $(\text{CD}_3)_2\text{SO}$ )  $\delta$ : 6.37 (dd, 1H,  $\text{H}_c$ ), 6.05 (dd, 1H,  $\text{H}_b$ ), 4.95 (s, 2H,  $\text{H}_d$ ), 2.25 (s, 3H,  $\text{H}_a$ ), 2.02 (s, 3H,  $\text{H}_e$ )

$^{13}\text{C}$  NMR (100MHz,  $(\text{CD}_3)_2\text{SO}$ )  $\delta$ : 174.5 ( $\text{C}_z$ ), 153.33 ( $\text{C}_x$ ), 138.28 ( $\text{C}_y$ ), 110.53 ( $\text{C}_c$ ), 109.4 ( $\text{C}_b$ ), 57.45 ( $\text{C}_d$ ), 36.16 ( $\text{C}_e$ ), 28.73 ( $\text{C}_a$ )

## Synthesis of Diels-Alder adducts

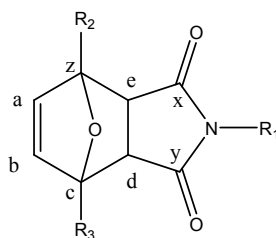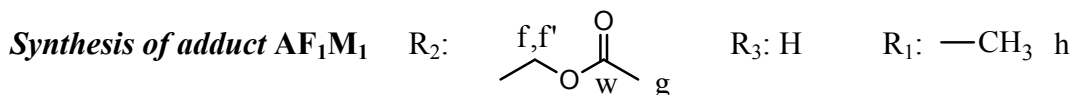

<sup>1</sup>H NMR (400MHz, (CD<sub>3</sub>)<sub>2</sub>SO, endo) δ : 6.47-6.46 (dd, <sup>3</sup>J<sub>ba</sub>=5.8Hz and <sup>3</sup>J<sub>bc</sub>=1.6Hz, 1H, H<sub>b</sub>), 6.35-6.33 (d, <sup>3</sup>J<sub>ab</sub>=5.8Hz, 1H, H<sub>a</sub>), 5.29-5.27 (dd, <sup>3</sup>J<sub>cd</sub>=5.6Hz and <sup>3</sup>J<sub>cb</sub>=1.6Hz, 1H, H<sub>c</sub>), 4.72-4.48 (dd, R<sub>F1</sub>, <sup>2</sup>J<sub>ff'</sub>=12.6Hz and <sup>2</sup>J<sub>f'f</sub>=86.4Hz, 2H, H<sub>f</sub> and H<sub>f'</sub>), 3.72-3.68 (dd, <sup>3</sup>J<sub>de</sub>=5.6Hz and <sup>3</sup>J<sub>de</sub>=7.6Hz, 1H, H<sub>d</sub>), 3.46-3.44 (d, J<sub>ed</sub>=7.6Hz, 1H, H<sub>e</sub>), 2.67 (s, R<sub>M1</sub>, 3H, H<sub>h</sub>), 2.05 (s, R<sub>F1</sub>, 3H, H<sub>g</sub>)

<sup>13</sup>C NMR (100MHZ, (CD<sub>3</sub>)<sub>2</sub>SO, endo) δ : 174.80 (C<sub>y</sub>), 174.75 (C<sub>x</sub>), 170.06 (C<sub>w</sub>), 135.67 (C<sub>b</sub>), 134.43 (C<sub>a</sub>), 88.95 (C<sub>z</sub>), 78.69 (C<sub>c</sub>), 61.59 (C<sub>f</sub> and C<sub>f'</sub>), 47.53 (C<sub>d</sub>), 46.49 (C<sub>e</sub>), 24.18 (C<sub>h</sub>), 20.52 (C<sub>g</sub>)

<sup>1</sup>H NMR (400MHz, (CD<sub>3</sub>)<sub>2</sub>SO, exo) δ : 6.6-6.57 (m, 1H, H<sub>b</sub>), 6.48-6.43 (m, 1H, H<sub>a</sub>), 5.12 (d, <sup>3</sup>J<sub>cd</sub>=1.7Hz, 1H, H<sub>c</sub>), 4.75-4.31 (dd, R<sub>F1</sub>, <sup>2</sup>J<sub>ff'</sub>=12.8Hz and <sup>2</sup>J<sub>f'f</sub>=96.6Hz, 2H, H<sub>f</sub> and H<sub>f'</sub>), 3.10-2.98 (m, 2H, H<sub>d</sub> and H<sub>e</sub>), 2.82 (s, R<sub>M1</sub>, 3H, H<sub>h</sub>), 2.01 (s, R<sub>F1</sub>, 3H, H<sub>g</sub>)

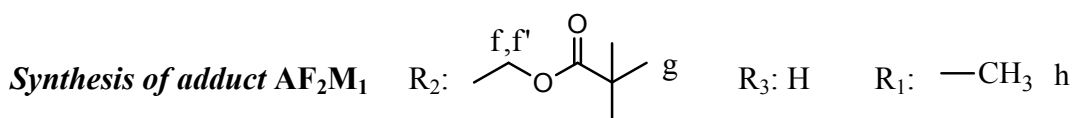

<sup>1</sup>H NMR (400MHz, (CD<sub>3</sub>)<sub>2</sub>SO, endo) δ : 6.5-6.43 (m, 1H, H<sub>b</sub>), 6.34-6.31 (d, <sup>3</sup>J<sub>ab</sub>=5.8Hz, 1H, H<sub>a</sub>), 5.31-5.28 (dd, <sup>3</sup>J<sub>cd</sub>=5.5Hz and <sup>3</sup>J<sub>cb</sub>=1.6Hz, 1H, H<sub>c</sub>), 4.75-4.47 (dd, R<sub>F2</sub>, <sup>2</sup>J<sub>ff'</sub>=12.8Hz and <sup>2</sup>J<sub>f'f</sub>=57.8Hz, 2H, H<sub>f</sub> and H<sub>f'</sub>), 3.72-3.67 (dd, <sup>3</sup>J<sub>de</sub>=5.5Hz and <sup>3</sup>J<sub>de</sub>=7.6Hz, 1H, H<sub>d</sub>), 3.46-3.43 (d, <sup>3</sup>J<sub>ed</sub>=7.6Hz, 1H, H<sub>e</sub>), 2.67 (s, R<sub>M1</sub>, 3H, H<sub>h</sub>), 1.15 (s, R<sub>F2</sub>, 9H, H<sub>g</sub>)

<sup>1</sup>H NMR (400MHz, (CD<sub>3</sub>)<sub>2</sub>SO, exo) δ : 6.5-6.43 (m, 2H, H<sub>a</sub> and H<sub>b</sub>), 5.14-5.13 (d, <sup>3</sup>J<sub>cd</sub>=1.6Hz, 1H, H<sub>c</sub>), 4.80-4.3 (dd, R<sub>F2</sub>, J<sub>ff'</sub>=12.8Hz and J<sub>f'f</sub>=103.9Hz, 2H, H<sub>f</sub> and H<sub>f'</sub>), 3.10-2.99 (m, 2H, H<sub>d</sub> and H<sub>e</sub>), 2.82 (s, R<sub>M1</sub>, 3H, H<sub>h</sub>), 1.12 (s, R<sub>F2</sub>, 9H, H<sub>g</sub>)

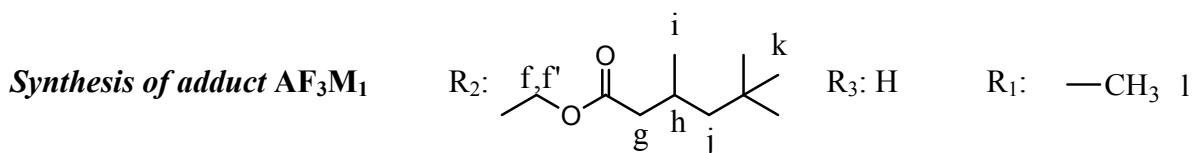

$^1\text{H NMR}$  (400MHz,  $(\text{CD}_3)_2\text{SO}$ , endo)  $\delta$  : 6.49-6.41 (m, 1H,  $\text{H}_b$ ), 6.33-6.30 (d,  $^3\text{J}_{ab}=5.7\text{Hz}$ , 1H,  $\text{H}_a$ ), 5.30-5.27 (dd,  $^3\text{J}_{cd}=5.5\text{Hz}$  and  $^3\text{J}_{cb}=1.6\text{Hz}$ , 1H,  $\text{H}_c$ ), 4.78-4.46 (2\*dd,  $\text{R}_{\text{F}3}$ ,  $^2\text{J}_{\text{ff}'}=12.8\text{Hz}$  and  $^2\text{J}_{\text{f}'}=57.3\text{Hz}$ , 2H,  $\text{H}_f$  and  $\text{H}_{\text{f}'}$ ), 3.72-3.67 (dd,  $^3\text{J}_{\text{dc}}=5.6\text{Hz}$  and  $^3\text{J}_{\text{de}}=7.6\text{Hz}$ , 1H,  $\text{H}_d$ ), 3.46-3.43 (d,  $^3\text{J}_{\text{ed}}=7.6\text{Hz}$ , 1H,  $\text{H}_e$ ), 2.68 (s,  $\text{R}_{\text{M}1}$ , 3H,  $\text{H}_l$ ), 2.36-1.87 (m,  $\text{R}_{\text{F}3}$ , 2H,  $\text{H}_g$ ), 1.27-0.85 (m,  $\text{R}_{\text{F}3}$ , 15H,  $\text{H}_h$ ,  $\text{H}_i$ ,  $\text{H}_j$  and  $\text{H}_k$ )

$^1\text{H NMR}$  (400MHz,  $(\text{CD}_3)_2\text{SO}$ , exo)  $\delta$  : 6.49-6.41 (m, 2H,  $\text{H}_a$  and  $\text{H}_b$ ), 5.12 (d,  $^3\text{J}_{cd}=1.6\text{Hz}$ , 1H,  $\text{H}_c$ ), 4.80-4.3 (2\*dd,  $\text{R}_{\text{F}3}$ ,  $^2\text{J}_{\text{ff}'}=12.8\text{Hz}$  and  $^2\text{J}_{\text{f}'}=102.8\text{Hz}$ , 2H,  $\text{H}_f$  and  $\text{H}_{\text{f}'}$ ), 3.14-3.08 (m, 2H,  $\text{H}_d$  and  $\text{H}_e$ ), 2.82 (s,  $\text{R}_{\text{M}1}$ , 3H,  $\text{H}_l$ ) 2.36-1.87 (m,  $\text{R}_{\text{F}3}$ , 2H,  $\text{H}_g$ ), 1.27-0.85 (m,  $\text{R}_{\text{F}3}$ , 15H,  $\text{H}_h$ ,  $\text{H}_i$ ,  $\text{H}_j$  and  $\text{H}_k$ )

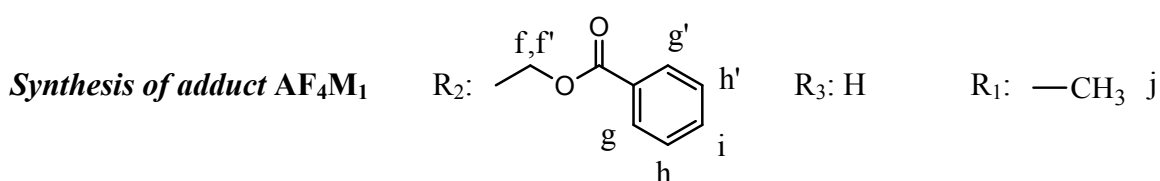

$^1\text{H NMR}$  (400MHz,  $(\text{CD}_3)_2\text{SO}$ , endo)  $\delta$  : 8.0-7.98 (m, 2H,  $\text{R}_{\text{F}4}$ ,  $\text{H}_g$  and  $\text{H}_{g'}$ ), 7.70-7.65 (m, 1H,  $\text{R}_{\text{F}4}$ ,  $\text{H}_i$ ), 7.57-7.51 (m, 2H,  $\text{R}_{\text{F}4}$ ,  $\text{H}_h$  and  $\text{H}_{h'}$ ), 6.52-6.50 (dd,  $^3\text{J}_{ba}=5.8\text{Hz}$  and  $^3\text{J}_{bc}=1.6\text{Hz}$ , 1H,  $\text{H}_b$ ), 6.47-6.46 (d,  $^3\text{J}_{ab}=5.8\text{Hz}$ , 1H,  $\text{H}_a$ ), 5.34-5.32 (dd,  $^3\text{J}_{cd}=5.8\text{Hz}$  and  $^3\text{J}_{cb}=1.6\text{Hz}$ , 1H,  $\text{H}_c$ ), 4.97-4.78 (dd,  $\text{R}_{\text{F}4}$ ,  $^2\text{J}_{\text{ff}'}=12.7\text{Hz}$  and  $^2\text{J}_{\text{f}'}=64.6\text{Hz}$ , 2H,  $\text{H}_f$  and  $\text{H}_{\text{f}'}$ ), 3.76-3.73 (dd,  $^3\text{J}_{\text{dc}}=5.8\text{Hz}$  and  $^3\text{J}_{\text{de}}=7.6\text{Hz}$ , 1H,  $\text{H}_d$ ), 3.60-3.58 (d,  $^3\text{J}_{\text{ed}}=7.6\text{Hz}$ , 1H,  $\text{H}_e$ ), 2.69 (s,  $\text{R}_{\text{M}1}$ , 3H,  $\text{H}_j$ )

$^1\text{H NMR}$  (400MHz,  $(\text{CD}_3)_2\text{SO}$ , exo)  $\delta$  : 7.94-7.91 (m, 2H,  $\text{R}_{\text{F}4}$ ,  $\text{H}_g$  and  $\text{H}_{g'}$ ), 7.70-7.65 (m, 1H,  $\text{R}_{\text{F}4}$ ,  $\text{H}_i$ ), 7.57-7.51 (m, 2H,  $\text{R}_{\text{F}4}$ ,  $\text{H}_h$  and  $\text{H}_{h'}$ ), 6.64-6.63 (dd,  $^3\text{J}_{ba}=5.6\text{Hz}$  and  $^3\text{J}_{bc}=1.6\text{Hz}$ , 1H,  $\text{H}_b$ ), 6.60-6.59 (d,  $^3\text{J}_{ab}=5.6\text{Hz}$ , 1H,  $\text{H}_a$ ), 5.17 (d,  $^3\text{J}_{cd}=1.6\text{Hz}$ , 1H,  $\text{H}_c$ ), 5.0-4.63 (dd,  $\text{R}_{\text{F}4}$ ,  $^2\text{J}_{\text{ff}'}=12.7\text{Hz}$  and  $^2\text{J}_{\text{f}'}=136.6\text{Hz}$ , 2H,  $\text{H}_f$  and  $\text{H}_{\text{f}'}$ ), 3.14-3.08 (m, 2H,  $\text{H}_d$  and  $\text{H}_e$ ), 2.83 (s,  $\text{R}_{\text{M}1}$ , 3H,  $\text{H}_j$ )

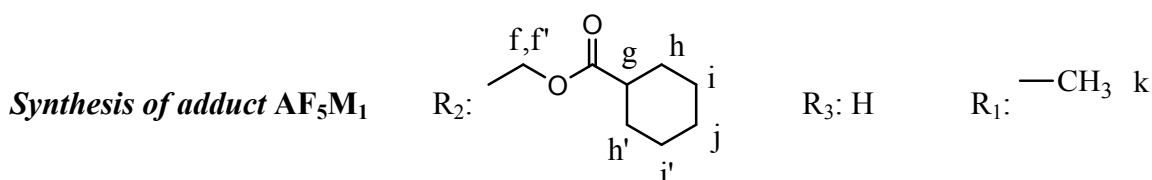

$^1\text{H NMR}$  (400MHz,  $(\text{CD}_3)_2\text{SO}$ , endo)  $\delta$  : 6.47-6.45 (dd,  $^3\text{J}_{ba}=5.8\text{Hz}$  and  $^3\text{J}_{bc}=1.8\text{Hz}$ , 1H,  $\text{H}_b$ ), 6.33-6.31 (d,  $^3\text{J}_{ab}=5.8\text{Hz}$ , 1H,  $\text{H}_a$ ), 5.29-5.27 (dd,  $^3\text{J}_{cd}=5.6\text{Hz}$  and  $^3\text{J}_{cb}=1.8\text{Hz}$ , 1H,  $\text{H}_c$ ), 4.74-4.48 (dd,  $\text{R}_{\text{F}5}$ ,  $^2\text{J}_{\text{ff}'}=12.9\text{Hz}$  and  $^2\text{J}_{\text{f}'}=92.7\text{Hz}$ , 2H,  $\text{H}_f$  and  $\text{H}_{\text{f}'}$ ), 3.71-3.68 (dd,  $^3\text{J}_{\text{dc}}=5.6\text{Hz}$  and

$^3J_{de}=7.6\text{Hz}$ , 1H,  $H_d$ ), 3.45-3.43 (d,  $^3J_{ed}=7.6\text{Hz}$ , 1H,  $H_e$ ), 2.67 (s,  $R_{M1}$ , 3H,  $H_k$ ), 2.39-2.27 (m,  $R_{F5}$ , 1H,  $H_g$ ), 1.82-1.12 (m,  $R_{F5}$ , 10H,  $H_h$ ,  $H_{h'}$ ,  $H_i$ ,  $H_{i'}$  and  $H_j$ )

$^1\text{H NMR}$  (400MHz,  $(\text{CD}_3)_2\text{SO}$ , exo)  $\delta$  : 6.6-6.58 (m, 2H,  $H_b$ ), 6.43-6.42 (d, 1H,  $^3J_{ab}=5.6\text{Hz}$ ,  $H_a$ ), 5.12 (d,  $^3J_{cd}=1.8\text{Hz}$ , 1H,  $H_c$ ), 4.75-4.31 (dd,  $R_{F5}$ ,  $^2J_{ff'}=12.6\text{Hz}$  and  $^2J_{f'f}=166.4\text{Hz}$ , 2H,  $H_f$  and  $H_{f'}$ ), 3.08-2.99 (m, 2H,  $H_d$  and  $H_e$ ), 2.82 (s,  $R_{M1}$ , 3H,  $H_k$ ), 2.39-2.27 (m,  $R_{F5}$ , 1H,  $H_g$ ), 1.82-1.12 (m,  $R_{F5}$ , 10H,  $H_h$ ,  $H_{h'}$ ,  $H_i$ ,  $H_{i'}$  and  $H_j$ )

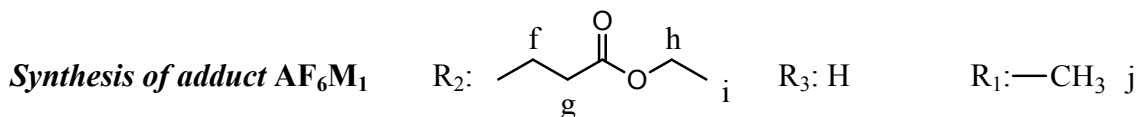

$^1\text{H NMR}$  (400MHz,  $(\text{CD}_3)_2\text{SO}$ , endo)  $\delta$  : 6.41-6.38 (dd,  $^3J_{ba}=5.8\text{Hz}$  and  $^3J_{bc}=1.6\text{Hz}$ , 1H,  $H_b$ ), 6.34-6.32 (d,  $^3J_{ab}=5.8\text{Hz}$ , 1H,  $H_a$ ), 5.22-5.19 (dd,  $^3J_{cd}=5.5\text{Hz}$  and  $^3J_{cb}=1.6\text{Hz}$ , 1H,  $H_c$ ), 4.11-4.02 (q,  $R_{F6}$ ,  $^3J_{hi}=7.1\text{Hz}$ , 2H,  $H_h$ ), 3.68-3.63 (dd,  $^3J_{dc}=5.5\text{Hz}$  and  $^3J_{de}=7.6\text{Hz}$ , 1H,  $H_d$ ), 3.31-3.28 (d,  $^3J_{ed}=7.6\text{Hz}$ , 1H,  $H_e$ ), 2.66 (s,  $R_{M1}$ , 3H,  $H_j'$ ), 2.62-2.01 (m,  $R_{F6}$ , 4H,  $H_f$  and  $H_g$ ), 1.21-1.15 (t,  $R_{F6}$ ,  $J_{hi}=7.1\text{Hz}$ , 3H,  $H_i$ )

$^1\text{H NMR}$  (400MHz,  $(\text{CD}_3)_2\text{SO}$ , exo)  $\delta$  : 6.57-6.54 (m, 2H,  $H_b$ ), 6.46-6.44 (d, 1H,  $^3J_{ab}=5.5\text{Hz}$ ,  $H_a$ ), 5.05 (d,  $^3J_{cd}=1.7\text{Hz}$ , 1H,  $H_c$ ), 4.07-3.98 (q,  $R_{F6}$ ,  $^3J_{hi}=7.1\text{Hz}$ , 2H,  $H_h$ ), 3.06-2.86 (m, 2H,  $H_d$  and  $H_e$ ), 2.81 (s,  $R_{M1}$ , 3H,  $H_j'$ ), 2.62-2.01 (m,  $R_{F6}$ , 4H,  $H_f$  and  $H_g$ ), 1.21-1.15 (t,  $R_{F6}$ ,  $^3J_{hi}=7.1\text{Hz}$ , 3H,  $H_i$ )

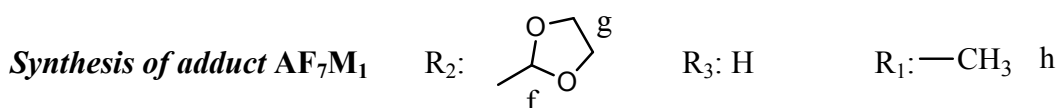

$^1\text{H NMR}$  (400MHz,  $(\text{CD}_3)_2\text{SO}$ , endo)  $\delta$  : 6.46-6.43 (dd,  $^3J_{ba}=5.8\text{Hz}$  and  $^3J_{bc}=1.6\text{Hz}$ , 1H,  $H_b$ ), 6.39-6.37 (d,  $^3J_{ab}=5.8\text{Hz}$ , 1H,  $H_a$ ), 5.44 (s,  $R_{F7}$ , 1H,  $H_f$ ), 5.31-5.28 (dd,  $^3J_{cd}=5.5\text{Hz}$  and  $^3J_{cb}=1.6\text{Hz}$ , 1H,  $H_c$ ), 4.06-3.86 (m,  $R_{F7}$ , 4H,  $H_g$ ), 3.71-3.66 (dd,  $^3J_{dc}=5.5\text{Hz}$  and  $^3J_{de}=7.6\text{Hz}$ , 1H,  $H_d$ ), 3.49-3.46 (d,  $^3J_{ed}=7.6\text{Hz}$ , 1H,  $H_e$ ), 2.66 (s,  $R_{M1}$ , 3H,  $H_h$ )

$^1\text{H NMR}$  (400MHz,  $(\text{CD}_3)_2\text{SO}$ , exo)  $\delta$  : 6.59-6.56 (m, 2H,  $H_b$ ), 6.46-6.44 (d, 1H,  $^3J_{ab}=5.5\text{Hz}$ ,  $H_a$ ), 5.18 (s,  $R_{F7}$ , 1H,  $H_f$ ), 5.15-5.14 (d,  $^3J_{cd}=1.7\text{Hz}$ , 1H,  $H_c$ ), 4.06-3.86 (m,  $R_{F7}$ , 4H,  $H_g$ ), 3.08-2.90 (m, 2H,  $H_d$  and  $H_e$ ), 2.81 (s,  $R_{M1}$ , 3H,  $H_h$ )

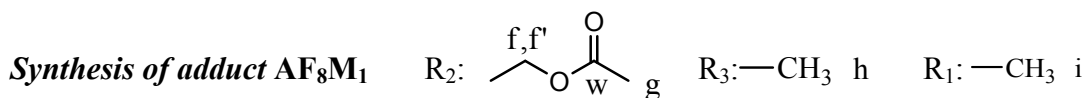



$^1\text{H NMR}$  (400MHz,  $(\text{CD}_3)_2\text{SO}$ , endo)  $\delta$  : 6.34-6.31 (m, 2H,  $\text{H}_a$  and  $\text{H}_b$ ), 4.67-4.21 (dd,  $\text{R}_{\text{F8}}$ , 2H,  $\text{H}_f$  and  $\text{H}_{f'}$ ), 3.58-3.33 (dd, 2H,  $\text{H}_d$  and  $\text{H}_e$ ), 2.67 (s,  $\text{R}_{\text{M1}}$ , 3H,  $\text{H}_i$ ), 2.06 (s, 3H,  $\text{H}_g$ ), 1.67 (s,  $\text{R}_{\text{F8}}$ , 3H,  $\text{H}_h$ )

$^1\text{H NMR}$  (400MHz,  $(\text{CD}_3)_2\text{SO}$ , exo)  $\delta$  : 6.45-6.41 (m, 2H,  $\text{H}_a$  and  $\text{H}_b$ ), 4.72-4.28 (dd,  $\text{R}_{\text{F8}}$ , 2H,  $\text{H}_f$  and  $\text{H}_{f'}$ ), 3.58-3.33 (dd, 2H,  $\text{H}_d$  and  $\text{H}_e$ ), 2.87 (s,  $\text{R}_{\text{M1}}$ , 3H,  $\text{H}_i$ ), 2.02 (s, 3H,  $\text{H}_g$ ), 1.57 (s,  $\text{R}_{\text{F8}}$ , 3H,  $\text{H}_h$ )

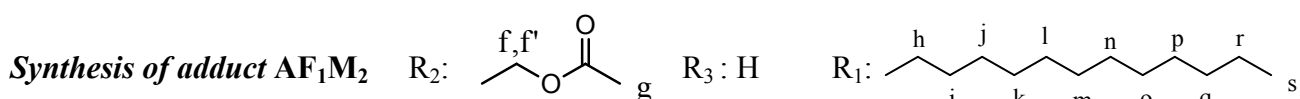

$^1\text{H NMR}$  (400MHz,  $(\text{CD}_3)_2\text{SO}$ , endo)  $\delta$  : 6.47-6.44 (m, 1H,  $\text{H}_b$ ), 6.35-6.33 (d,  $^3\text{J}_{ab}=5.8\text{Hz}$ , 1H,  $\text{H}_a$ ), 5.29-5.27 (dd,  $^3\text{J}_{cd}=5.6\text{Hz}$  and  $^3\text{J}_{cb}=1.5\text{Hz}$ , 1H,  $\text{H}_c$ ), 4.72-4.47 (dd,  $\text{R}_{\text{F1}}$ ,  $^2\text{J}_{ff'}=12.6\text{Hz}$  and  $^2\text{J}_{ff'}=86.4\text{Hz}$ , 2H,  $\text{H}_f$  and  $\text{H}_{f'}$ ), 3.70-3.66 (dd,  $^3\text{J}_{de}=5.6\text{Hz}$  and  $^3\text{J}_{de}=7.6\text{Hz}$ , 1H,  $\text{H}_d$ ), 3.45-3.43 (d,  $^3\text{J}_{ed}=7.6\text{Hz}$ , 1H,  $\text{H}_e$ ), 3.19-3.15 (t,  $\text{R}_{\text{M2}}$ ,  $^3\text{J}_{hi}=7.2\text{Hz}$ , 2H,  $\text{H}_h$ ), 2.05 (s,  $\text{R}_{\text{F1}}$ , 3H,  $\text{H}_g$ ), 1.35-1.29 (quin,  $\text{R}_{\text{M2}}$ ,  $^3\text{J}_{ih}=7.2\text{Hz}$ , 2H,  $\text{H}_i$ ), 1.27-1.14 (m,  $\text{R}_{\text{M2}}$ , 18H,  $\text{H}_j$ ,  $\text{H}_k$ ,  $\text{H}_l$ ,  $\text{H}_m$ ,  $\text{H}_n$ ,  $\text{H}_o$ ,  $\text{H}_p$ ,  $\text{H}_q$  and  $\text{H}_r$ ), 0.87-0.83 (t,  $\text{R}_{\text{M2}}$ , 3H,  $\text{H}_s$ )

$^1\text{H NMR}$  (400MHz,  $(\text{CD}_3)_2\text{SO}$ , exo)  $\delta$  : 6.59-6.57 (m, 1H,  $\text{H}_b$ ), 6.47-6.44 (m, 1H,  $\text{H}_a$ ), 5.12-5.11 (d,  $^3\text{J}_{cd}=1.8\text{Hz}$ , 1H,  $\text{H}_c$ ), 4.74-4.28 (dd,  $\text{R}_{\text{F1}}$ ,  $^2\text{J}_{ff'}=12.8\text{Hz}$  and  $^2\text{J}_{ff'}=172\text{Hz}$ , 2H,  $\text{H}_f$  and  $\text{H}_{f'}$ ), 3.35-3.32 (t,  $\text{R}_{\text{M2}}$ ,  $^3\text{J}_{hi}=7.1\text{Hz}$ , 2H,  $\text{H}_h$ ), 3.08-2.97 (m, 2H,  $\text{H}_d$  and  $\text{H}_e$ ), 2.01 (s,  $\text{R}_{\text{F1}}$ , 3H,  $\text{H}_g$ ), 1.46-1.39 (quin,  $\text{R}_{\text{M2}}$ ,  $^3\text{J}_{ih}=7.1\text{Hz}$ , 2H,  $\text{H}_i$ ), 1.27-1.14 (m,  $\text{R}_{\text{M2}}$ , 18H,  $\text{H}_j$ ,  $\text{H}_k$ ,  $\text{H}_l$ ,  $\text{H}_m$ ,  $\text{H}_n$ ,  $\text{H}_o$ ,  $\text{H}_p$ ,  $\text{H}_q$  and  $\text{H}_r$ ), 0.87-0.83 (t,  $\text{R}_{\text{M2}}$ , 3H,  $\text{H}_s$ )

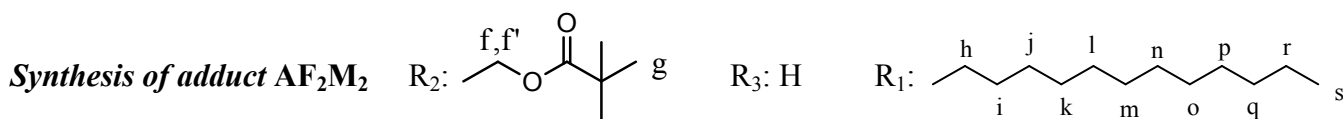

$^1\text{H NMR}$  (400MHz,  $(\text{CD}_3)_2\text{SO}$ , endo)  $\delta$  : 6.5-6.45 (m, 1H,  $\text{H}_b$ ), 6.33-6.31 (d,  $^3\text{J}_{ab}=5.8\text{Hz}$ , 1H,  $\text{H}_a$ ), 5.3-5.28 (dd,  $^3\text{J}_{cd}=5.6\text{Hz}$  and  $^3\text{J}_{cb}=1.8\text{Hz}$ , 1H,  $\text{H}_c$ ), 4.74-4.47 (dd,  $\text{R}_{\text{F1}}$ ,  $^2\text{J}_{ff'}=12.6\text{Hz}$  and  $^2\text{J}_{ff'}=93.4\text{Hz}$ , 2H,  $\text{H}_f$  and  $\text{H}_{f'}$ ), 3.69-3.66 (dd,  $^3\text{J}_{de}=5.6\text{Hz}$  and  $^3\text{J}_{de}=7.6\text{Hz}$ , 1H,  $\text{H}_d$ ), 3.44-3.42 (d,  $^3\text{J}_{ed}=7.6\text{Hz}$ , 1H,  $\text{H}_e$ ), 3.19-3.15 (t,  $\text{R}_{\text{M2}}$ ,  $^3\text{J}_{hi}=7.1\text{Hz}$ , 2H,  $\text{H}_h$ ), 1.35-1.14 (m,  $\text{R}_{\text{M2}}$ , 20H,  $\text{H}_i$ ,  $\text{H}_j$ ,  $\text{H}_k$ ,  $\text{H}_l$ ,  $\text{H}_m$ ,  $\text{H}_n$ ,  $\text{H}_o$ ,  $\text{H}_p$ ,  $\text{H}_q$  and  $\text{H}_r$ ), 1.14 (s,  $\text{R}_{\text{F2}}$ , 9H,  $\text{H}_g$ ), 0.87-0.83 (t,  $\text{R}_{\text{M2}}$ , 3H,  $\text{H}_s$ )

$^1\text{H NMR}$  (400MHz,  $(\text{CD}_3)_2\text{SO}$ , exo)  $\delta$  : 6.6-6.58 (m, 1H,  $\text{H}_b$ ), 6.5-6.45 (m, 1H,  $\text{H}_a$ ), 5.13 (d,  $^3\text{J}_{cd}=1.8\text{Hz}$ , 1H,  $\text{H}_c$ ), 4.75-4.24 (dd,  $\text{R}_{\text{F2}}$ ,  $^2\text{J}_{ff'}=12.8\text{Hz}$  and  $^2\text{J}_{ff'}=189.9\text{Hz}$ , 2H,  $\text{H}_f$  and  $\text{H}_{f'}$ ), 3.35-3.32 (t,  $\text{R}_{\text{M2}}$ ,  $^3\text{J}_{hi}=7.1\text{Hz}$ , 2H,  $\text{H}_h$ ), 3.08-2.98 (m, 2H,  $\text{H}_d$  and  $\text{H}_e$ ), 1.47-1.4 (quin,  $\text{R}_{\text{M2}}$ ,

$^3J_{ih}=7.1\text{Hz}$ , 2H,  $H_i$ ), 1.27-1.14 (m,  $R_{M2}$ , 18H,  $H_j$ ,  $H_k$ ,  $H_l$ ,  $H_m$ ,  $H_n$ ,  $H_o$ ,  $H_p$ ,  $H_q$  and  $H_r$ ), 1.12 (s,  $R_{F2}$ , 9H,  $H_g$ ), 0.87-0.83 (t,  $R_{M2}$ , 3H,  $H_s$ )

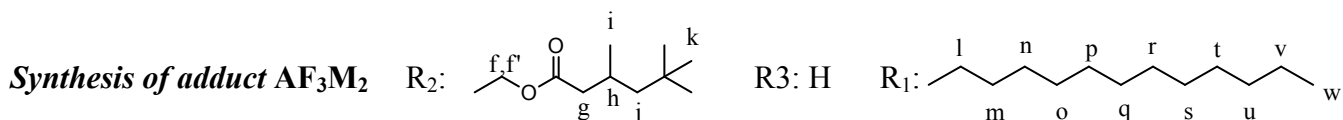

$^1\text{H NMR}$  (400MHz,  $(\text{CD}_3)_2\text{SO}$ , endo)  $\delta$ : 6.5-6.43 (m, 1H,  $H_b$ ), 6.31-6.30 (d,  $^3J_{ab}=5.6\text{Hz}$ , 1H,  $H_a$ ), 5.29-5.27 (dd,  $^3J_{cd}=5.6\text{Hz}$  and  $^3J_{cb}=1.8\text{Hz}$ , 1H,  $H_c$ ), 4.76-4.46 (ddd,  $R_{F3}$ ,  $^2J_{ff'}=12.6\text{Hz}$  and  $^2J_{ff'}=91.7\text{Hz}$ , 2H,  $H_f$  and  $H_{f'}$ ), 3.69-3.65 (dd,  $^3J_{de}=5.6\text{Hz}$  and  $^3J_{de}=7.6\text{Hz}$ , 1H,  $H_d$ ), 3.43-3.41 (d,  $^3J_{ed}=7.6\text{Hz}$ , 1H,  $H_e$ ), 3.18-3.15 (t,  $R_{M2}$ ,  $^3J_{hi}=7.2\text{Hz}$ , 2H,  $H_i$ ), 1.35-1.11 (m,  $R_{M2}$ , 20H,  $H_m$ ,  $H_n$ ,  $H_o$ ,  $H_p$ ,  $H_q$ ,  $H_r$ ,  $H_s$ ,  $H_t$ ,  $H_u$  and  $H_v$ ), 2.34-1.87 (m,  $R_{F3}$ , 2H,  $H_g$ ), 1.27-0.80 (m,  $R_{F3}$ , 15H,  $H_h$ ,  $H_i$ ,  $H_j$  and  $H_k$ ), 0.88-0.85 (t,  $R_{M2}$ , 3H,  $H_w$ )

$^1\text{H NMR}$  (400MHz,  $(\text{CD}_3)_2\text{SO}$ , exo)  $\delta$ : 6.59-6.57 (m, 1H,  $H_b$ ), 6.5-6.43 (m, 1H,  $H_a$ ), 5.12-5.11 (t,  $^3J_{cd}=1.5\text{Hz}$ , 1H,  $H_c$ ), 4.77-4.27 (ddd,  $R_{F3}$ ,  $^2J_{ff'}=12.8\text{Hz}$  and  $^2J_{ff'}=174\text{Hz}$ , 2H,  $H_f$  and  $H_{f'}$ ), 3.35-3.32 (t,  $R_{M2}$ ,  $^3J_{hi}=7.2\text{Hz}$ , 2H,  $H_i$ ), 3.07-2.96 (m, 2H,  $H_d$  and  $H_e$ ), 2.34-1.87 (m,  $R_{F3}$ , 2H,  $H_g$ ), 1.46-1.39 (quin,  $R_{M2}$ ,  $^3J_{ih}=7.1\text{Hz}$ , 2H,  $H_m$ ), 1.27-1.14 (m,  $R_{M2}$ , 18H,  $H_n$ ,  $H_o$ ,  $H_p$ ,  $H_q$ ,  $H_r$ ,  $H_s$ ,  $H_t$ ,  $H_u$  and  $H_v$ ), 1.27-0.80 (m,  $R_{F3}$ , 15H,  $H_h$ ,  $H_i$ ,  $H_j$  and  $H_k$ ), 0.88-0.85 (t,  $R_{M2}$ , 3H,  $H_w$ )

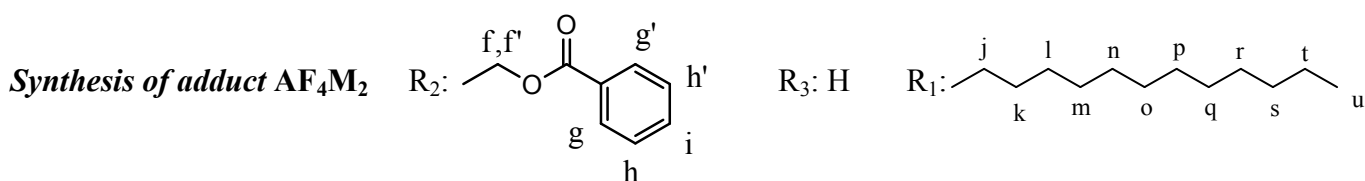

$^1\text{H NMR}$  (400MHz,  $(\text{CD}_3)_2\text{SO}$ , endo)  $\delta$ : 7.99-7.97 (m, 2H,  $R_{F4}$ ,  $H_g$  and  $H_{g'}$ ), 7.68-7.63 (m, 1H,  $R_{F4}$ ,  $H_i$ ), 7.55-7.49 (m, 2H,  $R_{F4}$ ,  $H_h$  and  $H_{h'}$ ), 6.51-6.49 (m, 1H,  $H_b$ ), 6.47-6.36 (d,  $^3J_{ab}=5.6\text{Hz}$ , 1H,  $H_a$ ), 5.29-5.26 (dd,  $^3J_{cd}=5.6\text{Hz}$  and  $J_{cb}=1.7\text{Hz}$ , 1H,  $H_c$ ), 4.96-4.77 (ddd,  $R_{F4}$ ,  $^2J_{ff'}=12.6\text{Hz}$  and  $^2J_{ff'}=91.7\text{Hz}$ , 2H,  $H_f$  and  $H_{f'}$ ), 3.74-3.71 (dd,  $^3J_{de}=5.6\text{Hz}$  and  $^3J_{de}=7.6\text{Hz}$ , 1H,  $H_d$ ), 3.58-3.56 (d,  $^3J_{ed}=7.6\text{Hz}$ , 1H,  $H_e$ ), 3.18-3.15 (t,  $R_{M2}$ ,  $^3J_{hi}=7.2\text{Hz}$ , 2H,  $H_j$ ), 1.33-1.11 (m,  $R_{M2}$ , 20H,  $H_k$ ,  $H_l$ ,  $H_m$ ,  $H_n$ ,  $H_o$ ,  $H_p$ ,  $H_q$ ,  $H_r$ ,  $H_s$  and  $H_t$ ), 0.87-0.84 (t,  $R_{M2}$ , 3H,  $H_u$ ),

$^1\text{H NMR}$  (400MHz,  $(\text{CD}_3)_2\text{SO}$ , exo)  $\delta$ : 7.93-7.90 (m, 2H,  $R_{F4}$ ,  $H_g$  and  $H_{g'}$ ), 7.68-7.63 (m, 1H,  $R_{F4}$ ,  $H_i$ ), 7.55-7.49 (m, 2H,  $R_{F4}$ ,  $H_h$  and  $H_{h'}$ ), 6.63-6.61 (m, 1H,  $H_b$ ), 6.59-6.58 (m, 1H,  $H_a$ ), 5.16 (t,  $^3J_{cd}=1.7\text{Hz}$ , 1H,  $H_c$ ), 5-4.63 (ddd,  $R_{F4}$ ,  $^2J_{ff'}=12.8\text{Hz}$  and  $^2J_{ff'}=140\text{Hz}$ , 2H,  $H_f$  and  $H_{f'}$ ), 3.34-3.31 (t,  $R_{M2}$ ,  $J_{hi}=7.2\text{Hz}$ , 2H,  $H_j$ ), 3.13-3.06 (m, 2H,  $H_d$  and  $H_e$ ), 1.45-1.39 (quin,  $R_{M2}$ ,  $^3J_{ih}=7.1\text{Hz}$ , 2H,  $H_k$ ), 1.27-1.14 (m,  $R_{2B}$ , 18H,  $H_l$ ,  $H_m$ ,  $H_n$ ,  $H_o$ ,  $H_p$ ,  $H_q$ ,  $H_r$ ,  $H_s$  and  $H_t$ ), 0.87-0.84 (t,  $R_{M2}$ , 3H,  $H_u$ )

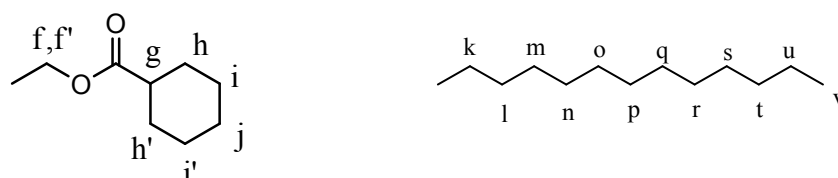

**Synthesis of adduct AF<sub>5</sub>M<sub>2</sub>** R<sub>2</sub>:

R<sub>3</sub>: H R<sub>1</sub>:

<sup>1</sup>H NMR (400MHz, (CD<sub>3</sub>)<sub>2</sub>SO, endo) δ : 6.47-6.44 (m, 1H, H<sub>b</sub>), 6.32-6.30 (d, <sup>3</sup>J<sub>ab</sub>=5.8Hz, 1H, H<sub>a</sub>), 5.29-5.27 (dd, <sup>3</sup>J<sub>cd</sub>=5.6Hz and <sup>3</sup>J<sub>cb</sub>=1.8Hz, 1H, H<sub>c</sub>), 4.75-4.47 (dd, R<sub>F5</sub>, <sup>2</sup>J<sub>ff'</sub>=12.6Hz and <sup>2</sup>J<sub>f'f</sub>=91.8Hz, 2H, H<sub>f</sub> and H<sub>f'</sub>), 3.69-3.66 (dd, <sup>3</sup>J<sub>de</sub>=5.6Hz and <sup>3</sup>J<sub>de</sub>=7.6Hz, 1H, H<sub>d</sub>), 3.43-3.41 (d, <sup>3</sup>J<sub>ed</sub>=7.6Hz, 1H, H<sub>e</sub>), 3.18-3.15 (t, R<sub>M2</sub>, <sup>3</sup>J<sub>hi</sub>=7.2Hz, 2H, H<sub>k</sub>), 2.37-2.26 (m, R<sub>F5</sub>, 1H, H<sub>g</sub>), 1.87-1.1 (m, R<sub>F5</sub>, 10H, H<sub>h</sub>, H<sub>h'</sub>, H<sub>i</sub>, H<sub>i'</sub> and H<sub>j</sub>), 1.37-1.1 (m, R<sub>M2</sub>, 20H, H<sub>l</sub>, H<sub>m</sub>, H<sub>n</sub>, H<sub>o</sub>, H<sub>p</sub>, H<sub>q</sub>, H<sub>r</sub>, H<sub>s</sub>, H<sub>t</sub> and H<sub>u</sub>), 0.87-0.83 (t, R<sub>M2</sub>, 3H, H<sub>v</sub>)

<sup>1</sup>H NMR (400MHz, (CD<sub>3</sub>)<sub>2</sub>SO, exo) δ : 6.59-6.57 (m, 1H, H<sub>b</sub>), 6.47-6.44 (m, 1H, H<sub>a</sub>), 5.12 (d, <sup>3</sup>J<sub>cd</sub>=1.5Hz, 1H, H<sub>c</sub>), 4.75-4.26 (dd, R<sub>F5</sub>, <sup>2</sup>J<sub>ff'</sub>=12.6Hz and <sup>2</sup>J<sub>f'f</sub>=182.8Hz, 2H, H<sub>f</sub> and H<sub>f'</sub>), 3.35-3.32 (t, R<sub>M2</sub>, <sup>3</sup>J<sub>hi</sub>=7.2Hz, 2H, H<sub>k</sub>), 3.07-2.97 (m, 2H, H<sub>d</sub> and H<sub>e</sub>), 2.20-2.14 (m, R<sub>F5</sub>, 1H, H<sub>g</sub>), 1.87-1.1 (m, R<sub>F5</sub>, 10H, H<sub>h</sub>, H<sub>h'</sub>, H<sub>i</sub>, H<sub>i'</sub> and H<sub>j</sub>), 1.47-1.4 (quin, R<sub>M2</sub>, <sup>3</sup>J<sub>ih</sub>=7.2Hz, 2H, H<sub>l</sub>), 1.37-1.1 (m, R<sub>M2</sub>, 18H, H<sub>m</sub>, H<sub>n</sub>, H<sub>o</sub>, H<sub>p</sub>, H<sub>q</sub>, H<sub>r</sub>, H<sub>s</sub>, H<sub>t</sub> and H<sub>u</sub>), 0.87-0.83 (t, R<sub>M2</sub>, 3H, H<sub>v</sub>)

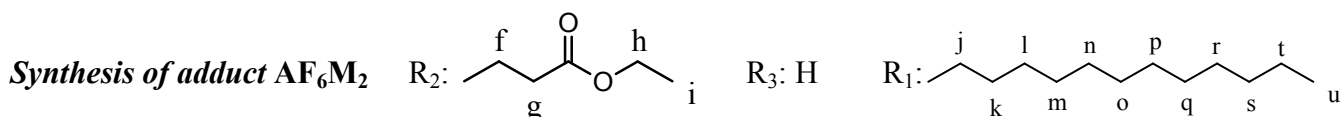

<sup>1</sup>H NMR (400MHz, (CD<sub>3</sub>)<sub>2</sub>SO, endo) δ : 6.38-6.35 (dd, <sup>3</sup>J<sub>ba</sub>=5.8Hz and <sup>3</sup>J<sub>bc</sub>=1.6Hz, 1H, H<sub>b</sub>), 6.31-6.30 (d, <sup>3</sup>J<sub>ab</sub>=5.8Hz, 1H, H<sub>a</sub>), 5.21-5.18 (dd, <sup>3</sup>J<sub>cd</sub>=5.5Hz and <sup>3</sup>J<sub>cb</sub>=1.6Hz, 1H, H<sub>c</sub>), 4.10-4.01 (q, R<sub>F6</sub>, <sup>3</sup>J<sub>hi</sub>=7.1Hz, 2H, H<sub>h</sub>), 3.65-3.59 (dd, <sup>3</sup>J<sub>de</sub>=5.5Hz and <sup>3</sup>J<sub>de</sub>=7.5Hz, 1H, H<sub>d</sub>), 3.31-3.28 (d, <sup>3</sup>J<sub>ed</sub>=7.6Hz, 1H, H<sub>e</sub>), 3.17-3.12 (t, R<sub>M2</sub>, <sup>3</sup>J<sub>hi</sub>=7.2Hz, 2H, H<sub>j</sub>), 2.54-1.99 (m, R<sub>F6</sub>, 4H, H<sub>f</sub> and H<sub>g</sub>), 1.35-1.1 (m, R<sub>M2</sub> and R<sub>F6</sub>, 23H, H<sub>i</sub>, H<sub>k</sub>, H<sub>l</sub>, H<sub>m</sub>, H<sub>n</sub>, H<sub>o</sub>, H<sub>p</sub>, H<sub>q</sub>, H<sub>r</sub>, H<sub>s</sub> and H<sub>t</sub>), 0.86-0.81 (t, R<sub>M2</sub>, 3H, H<sub>u</sub>)

<sup>1</sup>H NMR (400MHz, (CD<sub>3</sub>)<sub>2</sub>SO, exo) δ : 6.55-6.52 (m, 2H, H<sub>b</sub>), 6.46-6.42 (d, 1H, <sup>3</sup>J<sub>ab</sub>=5.6Hz, H<sub>a</sub>), 5.03 (d, <sup>3</sup>J<sub>cd</sub>=1.7Hz, 1H, H<sub>c</sub>), 4.09-4 (q, R<sub>F6</sub>, <sup>3</sup>J<sub>hi</sub>=7.1Hz, 2H, H<sub>h</sub>), 3.39-3.34 (t, R<sub>M2</sub>, <sup>3</sup>J<sub>hi</sub>=7.2Hz, 2H, H<sub>j</sub>), 3.03-2.84 (m, 2H, H<sub>d</sub> and H<sub>e</sub>), 2.54-1.99 (m, R<sub>F6</sub>, 4H, H<sub>f</sub> and H<sub>g</sub>), 1.51-1.40 (quin, R<sub>M2</sub>, <sup>3</sup>J<sub>ih</sub>=7.1Hz, 2H, H<sub>k</sub>), 1.35-1.1 (m, R<sub>2B</sub> and R<sub>1F</sub>, 18H, H<sub>i</sub>, H<sub>l</sub>, H<sub>m</sub>, H<sub>n</sub>, H<sub>o</sub>, H<sub>p</sub>, H<sub>q</sub>, H<sub>r</sub>, H<sub>s</sub> and H<sub>t</sub>), 0.86-0.81 (t, R<sub>M2</sub>, 3H, H<sub>u</sub>)

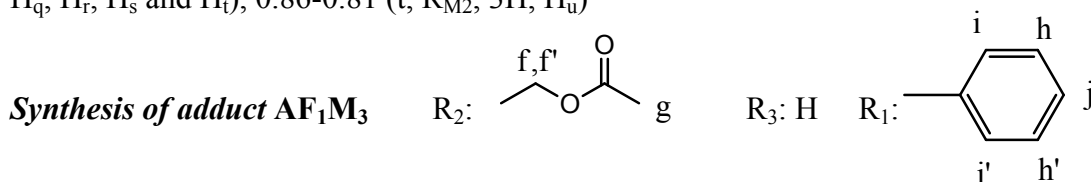

<sup>1</sup>H NMR (400MHz, (CD<sub>3</sub>)<sub>2</sub>SO, endo) δ : 7.52-7.38 (m, 3H, R<sub>M3</sub>, H<sub>h</sub>, H<sub>h'</sub> and H<sub>j</sub>), 7.14-7.11 (m, 2H, R<sub>M3</sub>, H<sub>i</sub> and H<sub>i'</sub>), 6.68-6.66 (dd, <sup>3</sup>J<sub>ba</sub>=5.8Hz and <sup>3</sup>J<sub>bc</sub>=1.5Hz, 1H, H<sub>b</sub>), 6.57-6.55 (d,

$^3J_{ab}=5.8\text{Hz}$ , 1H,  $H_a$ ), 5.4-5.38 (dd,  $^3J_{cd}=5.6\text{Hz}$  and  $^3J_{cb}=1.5\text{Hz}$ , 1H,  $H_c$ ), 4.77-4.54 (dd,  $R_{F1}$ ,  $^2J_{ff'}=12.6\text{Hz}$  and  $^2J_{f'f}=79\text{Hz}$ , 2H,  $H_f$  and  $H_{f'}$ ), 3.87-3.84 (dd,  $^3J_{dc}=5.6\text{Hz}$  and  $^3J_{de}=7.6\text{Hz}$ , 1H,  $H_d$ ), 3.62-3.60 (d,  $^3J_{ed}=7.6\text{Hz}$ , 1H,  $H_e$ ), 2.07 (s,  $R_{F1}$ , 3H,  $H_g$ )

$^1\text{H NMR}$  (400MHz,  $(\text{CD}_3)_2\text{SO}$ , exo)  $\delta$  : 7.52-7.38 (m, 3H,  $R_{M3}$ ,  $H_h$ ,  $H_{h'}$  and  $H_j$ ), 7.23-7.19 (m, 2H,  $R_{M3}$ ,  $H_i$  and  $H_{i'}$ ), 6.65-6.64 (m, 1H,  $H_b$ ), 6.52-6.50 (d,  $^3J_{ab}=5.8\text{Hz}$ , 1H,  $H_a$ ), 5.25-5.24 (d,  $^3J_{cd}=1.8\text{Hz}$ , 1H,  $H_c$ ), 4.81-4.40 (dd,  $R_{F1}$ ,  $^2J_{ff'}=13.1\text{Hz}$  and  $^2J_{f'f}=151.3\text{Hz}$ , 2H,  $H_f$  and  $H_{f'}$ ), 3.26-3.14 (m, 2H,  $H_d$  and  $H_e$ ), 2.01 (s,  $R_{F1}$ , 3H,  $H_g$ )

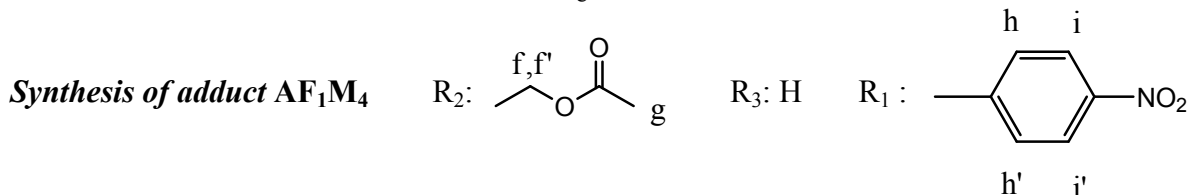

$^1\text{H NMR}$  (400MHz,  $(\text{CD}_3)_2\text{SO}$ , endo)  $\delta$  : 8.34-8.31 (m, 2H,  $R_{M4}$ ,  $H_i$  and  $H_{i'}$ ), 7.50-7.46 (m, 2H,  $R_{M4}$ ,  $H_h$  and  $H_{h'}$ ), 6.70-6.69 (dd,  $^3J_{ba}=5.8\text{Hz}$  and  $^3J_{bc}=1.6\text{Hz}$ , 1H,  $H_b$ ), 6.59-6.58 (d,  $^3J_{ab}=5.8\text{Hz}$ , 1H,  $H_a$ ), 5.43-5.41 (dd,  $^3J_{cd}=5.6\text{Hz}$  and  $^3J_{cb}=1.6\text{Hz}$ , 1H,  $H_c$ ), 4.78-4.56 (dd,  $R_{F1}$ ,  $^2J_{ff'}=12.9\text{Hz}$  and  $^2J_{f'f}=75.2\text{Hz}$ , 2H,  $H_f$  and  $H_{f'}$ ), 3.93-3.9 (dd,  $^3J_{dc}=5.6\text{Hz}$  and  $^3J_{de}=7.6\text{Hz}$ , 1H,  $H_d$ ), 3.68-3.66 (d,  $^3J_{ed}=7.6\text{Hz}$ , 1H,  $H_e$ ), 2.07 (s,  $R_{F1}$ , 3H,  $H_g$ )

$^{13}\text{C NMR}$  (100MHz,  $(\text{CD}_3)_2\text{SO}$ , endo)  $\delta$  : 174.84 ( $C_y$ ), 173.47 ( $C_x$ ), 170.05 ( $C_w$ ), 146.69 ( $C_v$ ), 137.25 ( $C_u$ ), 137.12 ( $C_b$ ), 134.77 ( $C_a$ ), 127.74 ( $C_h$  and  $C_{h'}$ ), 124.34 ( $C_i$  and  $C_{i'}$ ), 89.26 ( $C_z$ ), 79.20 ( $C_c$ ), 61.29 ( $C_f$  and  $C_{f'}$ ), 48.77 ( $C_d$ ), 46.70 ( $C_e$ ), 20.50 ( $C_g$ )

$^1\text{H NMR}$  (400MHz,  $(\text{CD}_3)_2\text{SO}$ , exo)  $\delta$  : 8.39-8.34 (m, 2H,  $R_{M4}$ ,  $H_i$  and  $H_{i'}$ ), 7.61-7.57 (m, 2H,  $R_{M3}$ ,  $H_h$  and  $H_{h'}$ ), 6.67-6.65 (m, 1H,  $H_b$ ), 6.53-6.51 (d,  $^3J_{ab}=5.6\text{Hz}$ , 1H,  $H_a$ ), 5.28-5.27 (d,  $^3J_{cd}=1.8\text{Hz}$ , 1H,  $H_c$ ), 4.84-4.43 (dd,  $R_{F1}$ ,  $^2J_{ff'}=12.9\text{Hz}$  and  $^2J_{f'f}=151.8\text{Hz}$ , 2H,  $H_f$  and  $H_{f'}$ ), 3.32-3.21 (m, 2H,  $H_d$  and  $H_e$ ), 2.02 (s,  $R_{F1}$ , 3H,  $H_g$ )

$^{13}\text{C NMR}$  (100MHz,  $(\text{CD}_3)_2\text{SO}$ , exo)  $\delta$  : 174.84 ( $C_y$ ), 173.28 ( $C_x$ ), 170.08 ( $C_w$ ), 146.77 ( $C_v$ ), 137.47 ( $C_b$ ), 137.41 ( $C_u$ ), 135.06 ( $C_a$ ), 127.82 ( $C_h$  and  $C_{h'}$ ), 124.8 ( $C_i$  and  $C_{i'}$ ), 89.55 ( $C_z$ ), 80.95 ( $C_c$ ), 61.54 ( $C_f$  and  $C_{f'}$ ), 47.7 ( $C_d$ ), 46.49 ( $C_e$ ), 20.55 ( $C_g$ )

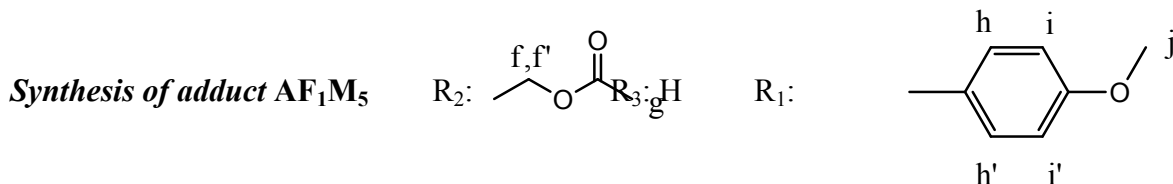

$^1\text{H NMR}$  (400MHz,  $(\text{CD}_3)_2\text{SO}$ , endo)  $\delta$  : 7.14-6.97 (m, 4H,  $R_{M5}$ ,  $H_h$ ,  $H_{h'}$ ,  $H_i$  and  $H_{i'}$ ), 6.67-6.62 (m, 1H,  $H_b$ ), 6.55-6.53 (d,  $^3J_{ab}=5.7\text{Hz}$ , 1H,  $H_a$ ), 5.39-5.36 (dd,  $^3J_{cd}=5.4\text{Hz}$  and  $^3J_{cb}=1.3\text{Hz}$ , 1H,  $H_c$ ), 4.77-4.52 (dd,  $R_{F1}$ ,  $^2J_{ff'}=12.7\text{Hz}$  and  $^2J_{f'f}=51\text{Hz}$ , 2H,  $H_f$  and  $H_{f'}$ ), 3.85-

3.79 (dd,  $^3J_{dc}=5.7\text{Hz}$  and  $^3J_{de}=7.6\text{Hz}$ , 1H, H<sub>d</sub>), 3.77 (s, R<sub>M5</sub>, 3H, H<sub>j'</sub>), 3.59-3.56 (d,  $^3J_{ed}=7.6\text{Hz}$ , 1H, H<sub>e</sub>), 2.07 (s, R<sub>F1</sub>, 3H, H<sub>g</sub>)

$^1\text{H NMR}$  (400MHz,  $(\text{CD}_3)_2\text{SO}$ , exo)  $\delta$  : 7.14-6.97 (m, 4H, R<sub>M5</sub>, H<sub>h</sub>, H<sub>h'</sub>, H<sub>i</sub> and H<sub>i'</sub>), 6.67-6.62 (m, 1H, H<sub>b</sub>), 6.51-6.49 (d,  $^3J_{ab}=5.8\text{Hz}$ , 1H, H<sub>a</sub>), 5.23-5.22 (d,  $^3J_{cd}=1.7\text{Hz}$ , 1H, H<sub>c</sub>), 4.81-4.8 (dd, R<sub>F1</sub>,  $^2J_{ff'}=12.9\text{Hz}$  and  $^2J_{f'f}=95.5\text{Hz}$ , 2H, H<sub>f</sub> and H<sub>f'</sub>), 3.78 (s, R<sub>M5</sub>, 3H, H<sub>j'</sub>), 3.23-3.11 (m, 2H, H<sub>d</sub> and H<sub>e</sub>), 2.01 (s, R<sub>1A</sub>, 3H, H<sub>g</sub>)

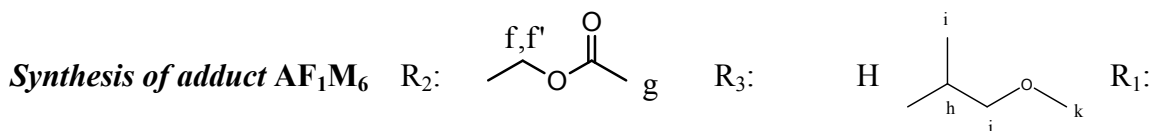

$^1\text{H NMR}$  (400MHz,  $(\text{CD}_3)_2\text{SO}$ , endo)  $\delta$  : 6.44-6.42 (dd, 1H, H<sub>b</sub>), 6.32-6.31 (d, 1H,  $^3J_{ab}=5.8\text{Hz}$ , H<sub>a</sub>), 5.30-5.28 (dd,  $^3J_{cd}=5.6\text{Hz}$ , 1H, H<sub>c</sub>), 4.72-4.48 (dd, R<sub>F1</sub>,  $^2J_{ff'}=12.9\text{Hz}$  and  $^2J_{f'f}=85\text{Hz}$ , 2H, H<sub>f</sub> and H<sub>f'</sub>), 3.71-3.68 (dd,  $^3J_{dc}=5.6\text{Hz}$  and  $^3J_{de}=7.6\text{Hz}$ , 1H, H<sub>d</sub>), 3.52 (m, R<sub>M6</sub>, 1H, H<sub>h</sub>), 3.46-3.44 (d,  $^3J_{ed}=7.6\text{Hz}$ , 1H, H<sub>e</sub>), 3.4-3.27 (m, R<sub>M6</sub>, 2H, H<sub>j</sub>), 3.18 (s, R<sub>M6</sub>, 3H, H<sub>k</sub>), 2.08 (s, R<sub>F1</sub>, 3H, H<sub>g</sub>), 2.05 (d, R<sub>M6</sub>, 3H, H<sub>i</sub>)

$^1\text{H NMR}$  (400MHz,  $(\text{CD}_3)_2\text{SO}$ , exo)  $\delta$  : 6.59-6.57 (dd, 1H, H<sub>b</sub>), 6.46-6.45 (d, 1H,  $^3J_{ab}=5.8\text{Hz}$ , H<sub>a</sub>), 5.13 (d,  $^3J_{cd}=1.8\text{Hz}$ , 1H, H<sub>c</sub>), 4.74-4.29 (dd,  $^2J_{ff'}=12\text{Hz}$  and  $^2J_{f'f}=168\text{Hz}$ , 2H, H<sub>f</sub> and H<sub>f'</sub>), 3.4-3.27 (m, R<sub>M6</sub>, 3H, H<sub>h</sub> and H<sub>j</sub>), 3.18 (s, R<sub>M6</sub>, 3H, H<sub>k</sub>), 3.11-3 (dd, 2H, H<sub>d</sub> and H<sub>e</sub>), 2.01 (s, R<sub>F1</sub>, 3H, H<sub>g</sub>), 1.90 (d, R<sub>M6</sub>, 3H, H<sub>i</sub>)

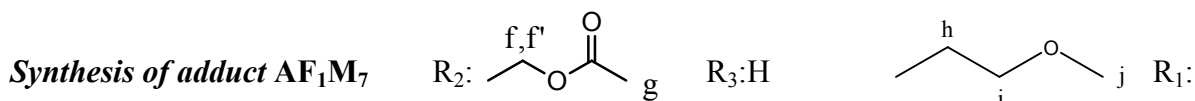

$^1\text{H NMR}$  (400MHz,  $(\text{CD}_3)_2\text{SO}$ , endo)  $\delta$  : 6.44-6.42 (dd, 1H, H<sub>b</sub>), 6.32-6.3 (d, 1H,  $^3J_{ab}=5.8\text{Hz}$ , H<sub>a</sub>), 5.29-5.28 (dd,  $^3J_{cd}=5.3\text{Hz}$ , 1H, H<sub>c</sub>), 4.72-4.47 (dd, R<sub>F1</sub>,  $^2J_{ff'}=12.9\text{Hz}$  and  $^2J_{f'f}=87\text{Hz}$ , 2H, H<sub>f</sub> and H<sub>f'</sub>), 3.71-3.67 (dd,  $^3J_{dc}=5.6\text{Hz}$ , 1H, H<sub>d</sub>), 3.58-3.28 (m, R<sub>M7</sub>, 3H, H<sub>e</sub>, H<sub>h</sub> and H<sub>i</sub>), 3.18 (s, R<sub>M6</sub>, 3H, H<sub>j</sub>), 2.05 (s, R<sub>F1</sub>, 3H, H<sub>g</sub>)

$^1\text{H NMR}$  (400MHz,  $(\text{CD}_3)_2\text{SO}$ , exo)  $\delta$  : 6.59-6.57 (dd, 1H,  $^3J_{ba}=5.7\text{Hz}$ , H<sub>b</sub>), 6.46-6.45 (d, 1H,  $^3J_{ab}=5.8\text{Hz}$ , H<sub>a</sub>), 5.13 (d,  $^3J_{cd}=1.8\text{Hz}$ , 1H, H<sub>c</sub>), 4.74-4.29 (dd,  $^2J_{ff'}=12.9\text{Hz}$  and  $^2J_{f'f}=168\text{Hz}$ , 2H, H<sub>f</sub> and H<sub>f'</sub>), 3.58-3.28 (m, R<sub>M7</sub>, 2H, H<sub>h</sub> and H<sub>i</sub>), 3.19 (s, R<sub>M7</sub>, 3H, H<sub>j</sub>), 3.12-3 (dd, 2H, H<sub>d</sub> and H<sub>e</sub>), 2.01 (s, R<sub>F1</sub>, 3H, H<sub>g</sub>)
